# Supplementary material
Source: MDPI journal article supplement (https://www.mdpi.com/2072-4292/15/3/864)
Supplement: s1 [file s1]

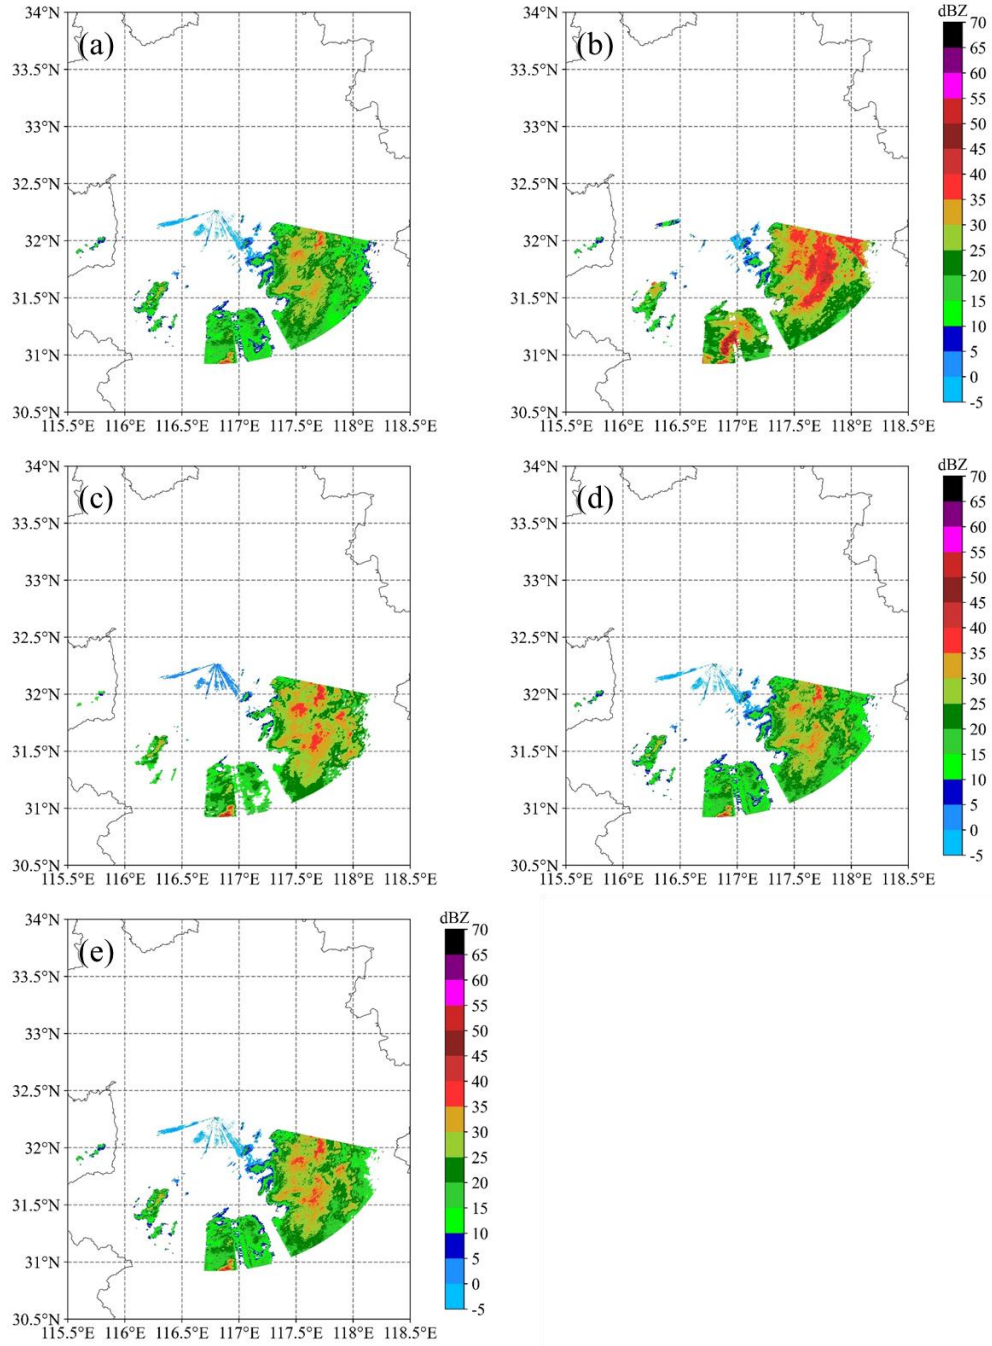

**Supplementary Figure S1.** (a) Before attenuation correction of X-band radar reflectivity at 07:28 a.m. (UTC+8) on July 17, 2021, (b) S-band radar reflectivity, (c) the XACL method, (d) the  $Z_H$  method correction, and (e)  $Z_H$ - $K_{DP}$  comprehensive correction; radar reflectivity at 2° elevation PPI.
